# Supplementary material for: Climate change leads to accelerated transformation of high‐elevation vegetation in the central Alps
Source: PubMed Central journal article supplement (PMC6175417; doi:10.1111/nph.15290), 2018-06-25
Supplement: NPH-220-447-s001.pdf [file NPH-220-447-s001.pdf]

## ***New Phytologist* Supporting Information**

### **Climate change leads to accelerated transformation of high-elevation vegetation in the central Alps**

Andrea Lamprecht, Philipp Robert Semenchuk, Klaus Steinbauer, Manuela Winkler and Harald Pauli

Article acceptance date: 23 May 2018

The following Supporting Information is available for this article:

|                                                                                                                                                                  |    |
|------------------------------------------------------------------------------------------------------------------------------------------------------------------|----|
| <b>Fig. S1</b> Location of permanent plots on Mount Schrankogel with transect details .....                                                                      | 3  |
| <b>Fig. S2</b> Correlation between thermic indicator and temperature sum on Mount Schrankogel .....                                                              | 5  |
| <b>Fig. S3</b> Vascular plant species richness per altitudinal rank in the survey years 1994, 2004 and 2014 .....                                                | 7  |
| <b>Fig. S4</b> Relative colonisation and disappearance per altitudinal rank in the periods 1994–2004 and 2004–2014 .....                                         | 10 |
| <b>Fig. S5</b> Cover sum of vascular plant species per altitudinal rank in the survey years 1994, 2004 and 2014 .....                                            | 12 |
| <b>Fig. S6</b> Correlation between the changes of thermic indicator and changes of soil moisture indicator per plot in the periods 1994–2004 and 2004–2014 ..... | 15 |
| <b>Fig. S7</b> Topographic parameters per block on Mount Schrankogel .....                                                                                       | 16 |
| <b>Fig. S8</b> Non-metric multidimensional scaling (NMDS) of topographic parameters of plots .....                                                               | 17 |
| <b>Table S1</b> Setup of permanent plots for monitoring of vascular plant species on Mount Schrankogel .....                                                     | 4  |
| <b>Table S2</b> Frequency of annual plant species .....                                                                                                          | 4  |
| <b>Table S3</b> Vascular plant species per altitudinal rank in the survey years 1994, 2004 and 2014 .....                                                        | 5  |
| <b>Table S4</b> Vascular plant species richness in the survey years 1994, 2004 and 2014 .....                                                                    | 6  |
| <b>Table S5</b> Changes in vascular plant species richness in the periods 1994–2004, 1994–2014 and 2004–2014 .....                                               | 6  |
| <b>Table S6</b> Vascular plant species richness per altitudinal rank in the survey years 1994, 2004 and 2014 .....                                               | 7  |
| <b>Table S7</b> Changes in vascular plant species richness per altitudinal rank in the periods 1994–2004, 1994–2014 and 2004–2014 .....                          | 8  |
| <b>Table S8</b> Number of colonising and disappearing species at the end of the periods 1994–2004 and 2004–2014 .....                                            | 8  |
| <b>Table S9</b> Differences between numbers of colonising and disappearing species within and among the periods 1994–2004 and 2004–2014 .....                    | 9  |
| <b>Table S10</b> Relative colonisation and disappearance per altitudinal rank in the periods 1994–2004 and 2004–2014 ..                                          | 10 |

|                                                                                                                                                   |    |
|---------------------------------------------------------------------------------------------------------------------------------------------------|----|
| <b>Table S11</b> Changes in relative colonisation and disappearance per altitudinal rank in the periods 1994-2004 and 2004-2014.....              | 11 |
| <b>Table S12</b> Cover sum of vascular plant species in the survey years 1994, 2004 and 2014.....                                                 | 11 |
| <b>Table S13</b> Changes in cover sum of species in the periods 1994-2004, 1994-2014 and 2004-2014 .....                                          | 11 |
| <b>Table S14</b> Cover sum of vascular plant species per altitudinal rank in the survey years 1994, 2004 and 2014 .....                           | 12 |
| <b>Table S15</b> Changes in mean cover sum of vascular plant species per altitudinal rank in the periods 1994-2004, 1994-2014 and 2004-2014 ..... | 13 |
| <b>Table S16</b> Thermic indicator in the survey years 1994, 2004 and 2014 .....                                                                  | 13 |
| <b>Table S17</b> Thermophilisation in the periods 1994-2004, 1994-2014 and 2004-2014 .....                                                        | 14 |
| <b>Table S18</b> Changes in thermophilisation between the periods 1994-2004 and 2004-2014.....                                                    | 14 |
| <b>Table S19</b> Soil moisture indicator in the survey years 1994, 2004 and 2014 .....                                                            | 14 |
| <b>Table S20</b> Change in soil moisture indicator in the periods 1994-2004, 1994-2014 and 2004-2014 .....                                        | 15 |
| <b>Table S21</b> Changes in $\Delta$ soil moisture indicator between the periods 1994-2004 and 2004-2014 .....                                    | 15 |
| <b>Table S22</b> Differences among blocks on Mount Schrankogel .....                                                                              | 17 |
| <b>Table S23</b> Vascular plant species richness in the survey years 1994 and 2014 .....                                                          | 18 |
| <b>Table S24</b> Changes in vascular plant species richness in the period 1994-2014.....                                                          | 18 |
| <b>Table S25</b> Number of colonising and disappearing species in the period 1994-2014.....                                                       | 18 |
| <b>Table S26</b> Differences between numbers of colonising and disappearing species in the period 1994-2014 .....                                 | 19 |
| <b>Table S27</b> Thermic indicator in the survey years 1994 and 2014 .....                                                                        | 19 |
| <b>Table S28</b> Thermophilisation in the period 1994-2014.....                                                                                   | 19 |
| <b>Table S29</b> Soil moisture indicator in the survey years 1994 and 2014 .....                                                                  | 20 |
| <b>Table S30</b> Changes in soil moisture in the period 1994-2014 .....                                                                           | 20 |

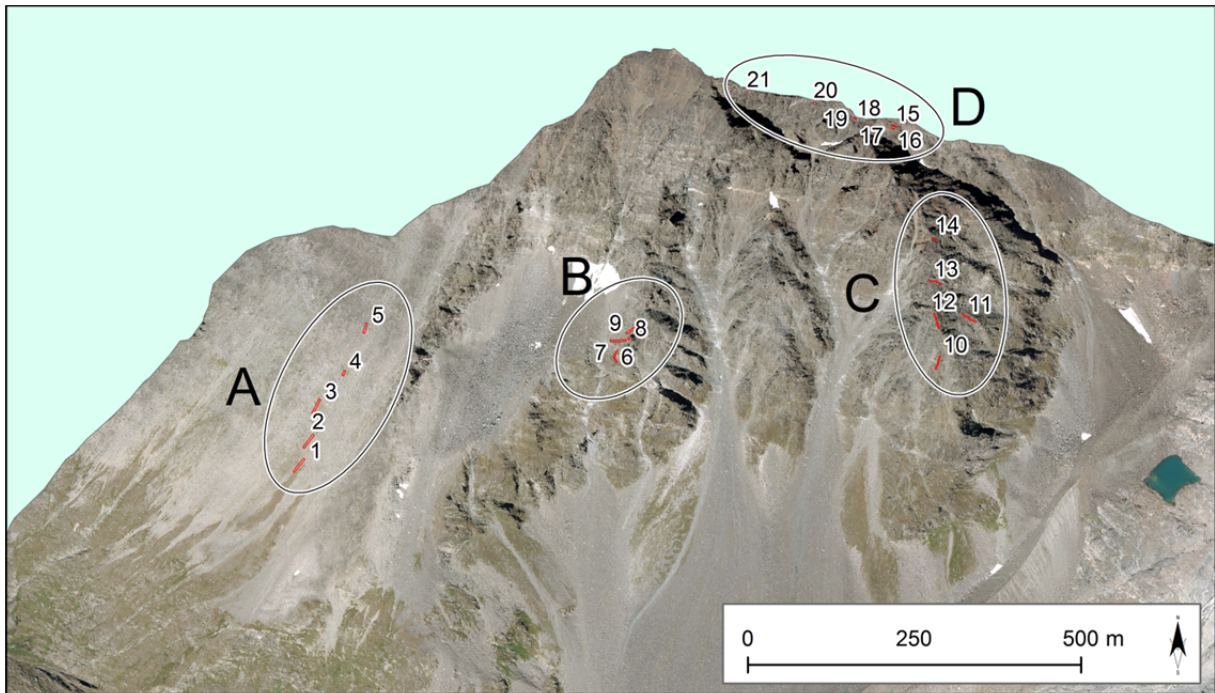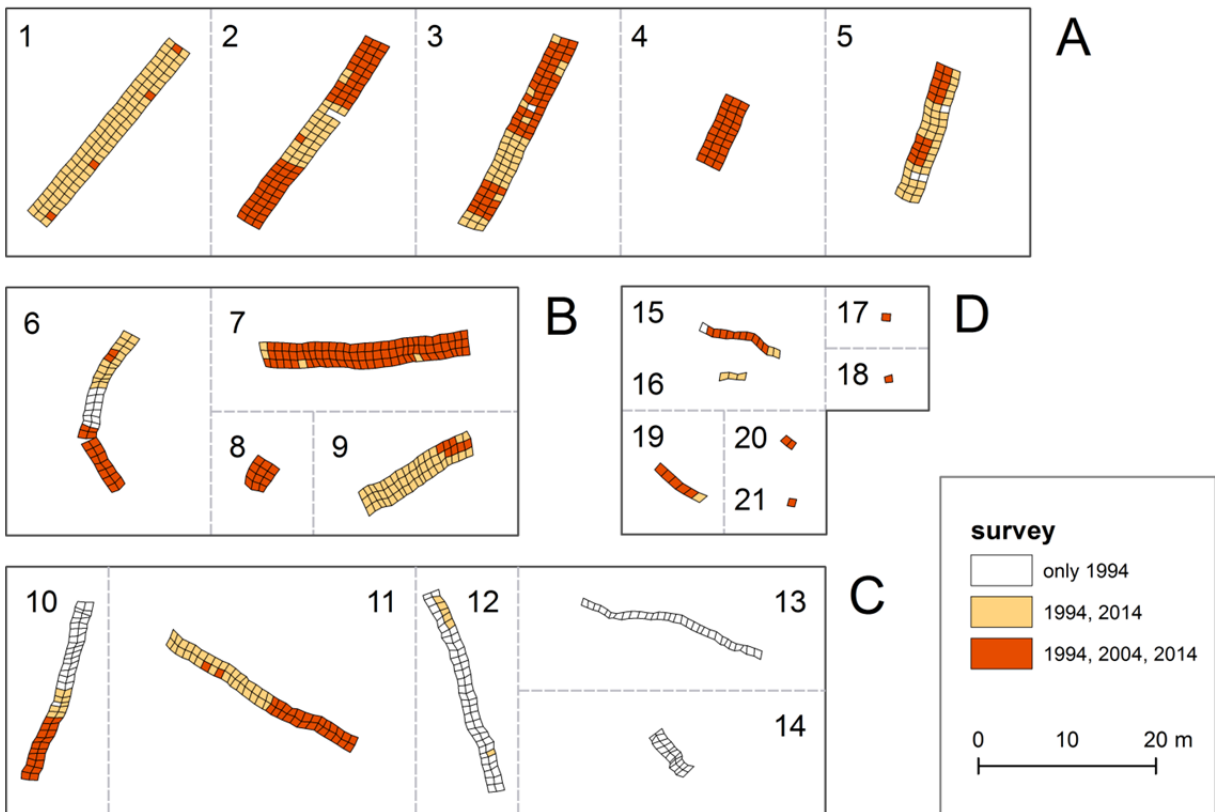

**Fig. S1** Location of permanent plots on Mount Schrankogel with transect details. Plots are grouped in transects clustered in four topographic blocks: A) uniformly shaped SW- slope, rich in scree; B) rugged S-facing ridge, C) rugged S-SE facing ridge and D) S-facing high-elevation plots along the E-ridge. Orthophotos (© Land Tirol) modified with ArcGIS 10.3. for Desktop, Esri Inc. Inserts show a detailed view of each transect.

**Table S1** Setup of permanent plots for monitoring of vascular plant species on Mount Schrankogel. Within four blocks (A, B, C, D), 21 transects are situated, each consisting of 1 up to 90 1-m<sup>2</sup> permanent plots. The number of plots surveyed in all three survey-years 1994, 2004 and 2014 and the number of plots of an additional dataset including only plots from 1994 and 2014 (data only given in supplementary; Tables S23 – S30), as well as the altitudinal range of each transect are given. Transects 12-14 were not resurveyed.

| Block | Transect | Number of plots | Number of plots of additional dataset (1994 – 2014) | Altitude [m] |
|-------|----------|-----------------|-----------------------------------------------------|--------------|
| A     | 1        | 4               | 90                                                  | 2911-2927    |
| A     | 2        | 59              | 88                                                  | 2936-2952    |
| A     | 3        | 52              | 89                                                  | 2970-2987    |
| A     | 4        | 30              | 30                                                  | 3022-3028    |
| A     | 5        | 18              | 51                                                  | 3074-3084    |
|       | sum A    | 163             | 348                                                 | 2911-3084    |
| B     | 6        | 20              | 38                                                  | 3072-3086    |
| B     | 7        | 85              | 89                                                  | 3088-3105    |
| B     | 8        | 12              | 12                                                  | 3108-3109    |
| B     | 9        | 7               | 56                                                  | 3109-3120    |
|       | sum B    | 124             | 195                                                 | 3072-3120    |
| C     | 10       | 20              | 29                                                  | 3084-3094    |
| C     | 11       | 28              | 56                                                  | 3100-3115    |
|       | sum C    | 48              | 85                                                  | 3084-3115    |
| D     | 15       | 10              | 12                                                  | 3348-3354    |
| D     | 16       | 0               | 3                                                   | 3348-3349    |
| D     | 17       | 1               | 1                                                   | 3360         |
| D     | 18       | 1               | 1                                                   | 3382         |
| D     | 19       | 5               | 6                                                   | 3392-3349    |
| D     | 20       | 2               | 2                                                   | 3418-3420    |
| D     | 21       | 1               | 1                                                   | 3457         |
|       | sum D    | 20              | 26                                                  | 3348-3457    |
|       | total    | 355             | 654                                                 | 2911-3457    |

**Table S2** Frequency of annual plant species. Number of plots where annual species occurred in the survey years 1994, 2004 and 2014 in the permanent plots on Mount Schrankogel.

| Year | <i>Euphrasia minima</i> | <i>Gentianella tenella</i> |
|------|-------------------------|----------------------------|
| 1994 | 37                      | 0                          |
| 2004 | 14                      | 0                          |
| 2014 | 166                     | 6                          |

**Table S3** Vascular plant species per altitudinal rank in the survey years 1994, 2004 and 2014 over the whole study area on Mount Schrankogel. The altitudinal rank (AR) denotes a species' distribution centre along the elevation gradient (range; after Gottfried et al. 2012). Shown are the total number of species over the whole study area in all three study years, the number of species over the whole study area present in 1994, 2004 and 2014, respectively, and all vascular plant species per altitudinal rank. Species present in all three surveys are given in bold. Species which occur for the first time in the whole study area in a survey year are marked with \*, which disappeared completely in one survey year with †, in each case with the corresponding year.

| Altitudinal rank | Range                         | Number of species |      |      |      | Species                                                                                                                                                                                                                                                                                                                                                                                                                                                                                                                                                                                                                                                                                                                                                                                                                                                                                                                                                                                                                                                                                                                                                                                                                                                                                                                                                                                                           |
|------------------|-------------------------------|-------------------|------|------|------|-------------------------------------------------------------------------------------------------------------------------------------------------------------------------------------------------------------------------------------------------------------------------------------------------------------------------------------------------------------------------------------------------------------------------------------------------------------------------------------------------------------------------------------------------------------------------------------------------------------------------------------------------------------------------------------------------------------------------------------------------------------------------------------------------------------------------------------------------------------------------------------------------------------------------------------------------------------------------------------------------------------------------------------------------------------------------------------------------------------------------------------------------------------------------------------------------------------------------------------------------------------------------------------------------------------------------------------------------------------------------------------------------------------------|
|                  |                               | All               | 1994 | 2004 | 2014 |                                                                                                                                                                                                                                                                                                                                                                                                                                                                                                                                                                                                                                                                                                                                                                                                                                                                                                                                                                                                                                                                                                                                                                                                                                                                                                                                                                                                                   |
| AR1              | Subnival – nival              | 6                 | 6    | 6    | 6    | <b><i>Androsace alpina</i>; <i>Cerastium uniflorum</i>; <i>Poa laxa</i>; <i>Ranunculus glacialis</i>; <i>Saxifraga bryoides</i>; <i>Saxifraga oppositifolia</i> subsp. <i>oppositifolia</i></b>                                                                                                                                                                                                                                                                                                                                                                                                                                                                                                                                                                                                                                                                                                                                                                                                                                                                                                                                                                                                                                                                                                                                                                                                                   |
| AR2              | Alpine – subnival             | 20                | 20   | 20   | 20   | <b><i>Arenaria ciliata</i> subsp. <i>ciliata</i>; <i>Cardamine resedifolia</i>; <i>Draba fladnizensis</i>; <i>Erigeron uniflorus</i>; <i>Festuca intercedens</i>; <i>Gentiana bavarica</i>; <i>Geum reptans</i>; <i>Leucanthemopsis alpina</i> subsp. <i>alpina</i>; <i>Linaria alpina</i>; <i>Luzula spicata</i>; <i>Oreochloa disticha</i>; <i>Pedicularis asplenifolia</i>; <i>Potentilla frigida</i>; <i>Primula glutinosa</i>; <i>Saxifraga androsacea</i>; <i>Saxifraga exarata</i> subsp. <i>exarata</i>; <i>Saxifraga seguieri</i>; <i>Silene acaulis</i> subsp. <i>bryoides</i>; <i>Trisetum spicatum</i> subsp. <i>spicatum</i>; <i>Veronica alpina</i></b><br><i>Agrostis alpina</i> <sup>*14</sup> ; <i>Agrostis rupestris</i> ; <i>Antennaria carpatica</i> ; <i>Carex curvula</i> subsp. <i>curvula</i> ; <i>Cerastium cerastoides</i> ; <i>Cerastium pedunculatum</i> <sup>*14</sup> ; <i>Gentiana brachyphylla</i> subsp. <i>brachyphylla</i> ; <i>Juncus jacquinii</i> ; <i>Minuartia sedoides</i> ; <i>Minuartia verna</i> subsp. <i>verna</i> ; <i>Omalotheca supina</i> ; <i>Oxyria digyna</i> <sup>*04, †14</sup> ; <i>Phyteuma hemisphaericum</i> ; <i>Poa alpina</i> ; <i>Primula minima</i> ; <i>Sagina saginoides</i> subsp. <i>saginoides</i> ; <i>Salix herbacea</i> ; <i>Sedum alpestre</i> ; <i>Senecio carniolicus</i> ; <i>Sibbaldia procumbens</i> ; <i>Veronica bellidioides</i> |
| AR3              | Alpine                        | 21                | 18   | 19   | 20   | <i>Alchemilla vulgaris</i> agg. <sup>*14</sup> ; <i>Anthoxanthum odoratum</i> subsp. <i>alpinum</i> <sup>*04</sup> ; <i>Avenula versicolor</i> subsp. <i>versicolor</i> ; <i>Botrychium lunaria</i> <sup>*04</sup> ; <i>Festuca halleri</i> subsp. <i>halleri</i> ; <i>Geum montanum</i> ; <i>Homogyne alpina</i> <sup>*14</sup> ; <i>Leontodon pyrenaicus</i> subsp. <i>helveticus</i> ; <b><i>Polygonum viviparum</i></b> ; <i>Potentilla aurea</i> subsp. <i>aurea</i> <sup>*14</sup> ; <i>Potentilla crantzii</i> <sup>*14</sup> ; <i>Primula hirsuta</i> <sup>*14</sup> ; <i>Ranunculus grenieranus</i> <sup>†04</sup> ; <i>Taraxacum apenninum</i> agg. <sup>*04</sup>                                                                                                                                                                                                                                                                                                                                                                                                                                                                                                                                                                                                                                                                                                                                      |
| AR4              | (Montane -) treeline – alpine | 14                | 6    | 8    | 13   |                                                                                                                                                                                                                                                                                                                                                                                                                                                                                                                                                                                                                                                                                                                                                                                                                                                                                                                                                                                                                                                                                                                                                                                                                                                                                                                                                                                                                   |

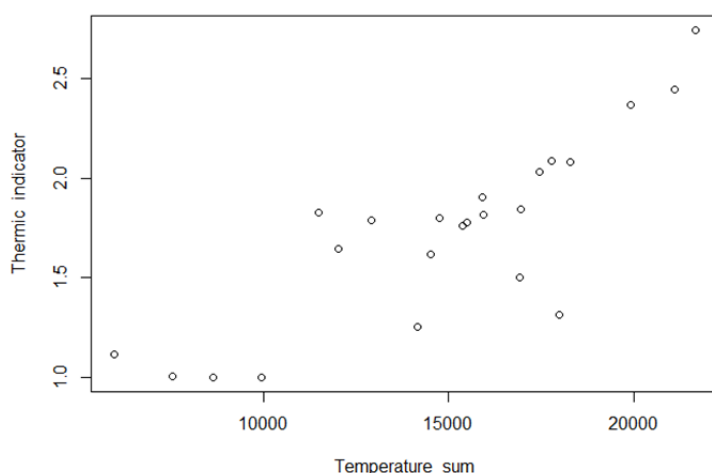

**Fig. S2** Correlation between thermic indicator and temperature sum on Mount Schrankogel. The thermic indicator per plot was calculated as the mean altitudinal rank (1 = subnival-nival, 2 = alpine-subnival, 3 = alpine, 4 = treeline-alpine species) weighted with the respective species' cover (Gottfried et al., 2012). The shown thermic indicator values are means from five plots in the vicinity of each temperature logger. Temperature sums represent annual mean values of hourly measurements from soil temperature loggers (n=23) summed up above a threshold of 3 °C in the period 01.08.2012 – 31.07.2014. The correlation was highly significant (linear mixed effect model;  $p < 0.0001$ ;  $df = 21$ ; marginal  $R^2 = 0.66$ , conditional  $R^2 = 0.7$ ; calculated using the function *r.squaredGLMM* from the R-package *MuMIn*; Burnham & Anderson, 2002).

## Vascular plant species richness

**Table S4** Vascular plant species richness in the survey years 1994, 2004 and 2014 on Mount Schrankogel. **a)** Mean and standard error (SE) of raw data and **b)** least-square mean (lsmean), standard error (SE), degrees of freedom (df) and 95% confidence interval (LCL and UCL), derived from generalized linear mixed effect models with a penalized quasi-likelihood estimation and a Poisson distribution, of the species richness per plot in the three survey years For plot numbers per block see Table S1.

| Year | Block | (a) Raw data |      | (b) Model |      |    |      |       |
|------|-------|--------------|------|-----------|------|----|------|-------|
|      |       | mean         | SE   | lsmean    | SE   | df | LCL  | UCL   |
| 1994 | All   | 10.84        | 0.21 | 8.81      | 1.26 | 3  | 5.59 | 13.90 |
| 2004 | All   | 12.61        | 0.23 | 10.26     | 1.47 | 3  | 6.50 | 16.17 |
| 2014 | All   | 13.08        | 0.22 | 10.64     | 1.52 | 3  | 6.74 | 16.77 |
| 1994 | A     | 11.46        | 0.30 | 10.07     | 1.26 | 4  | 7.11 | 14.26 |
| 2004 | A     | 14.15        | 0.32 | 12.43     | 1.56 | 4  | 8.78 | 17.60 |
| 2014 | A     | 14.53        | 0.29 | 12.77     | 1.60 | 4  | 9.02 | 18.08 |
| 1994 | B     | 9.75         | 0.31 | 8.75      | 1.15 | 3  | 5.76 | 13.28 |
| 2004 | B     | 10.60        | 0.33 | 9.51      | 1.25 | 3  | 6.26 | 14.43 |
| 2014 | B     | 11.23        | 0.31 | 10.07     | 1.32 | 3  | 6.63 | 15.29 |
| 1994 | C     | 13.65        | 0.51 | 13.32     | 0.47 | 1  | 8.47 | 20.94 |
| 2004 | C     | 15.13        | 0.52 | 14.76     | 0.52 | 1  | 9.42 | 23.13 |
| 2014 | C     | 15.54        | 0.58 | 15.17     | 0.54 | 1  | 9.69 | 23.75 |
| 1994 | D     | 5.80         | 0.46 | 5.54      | 0.45 | 19 | 4.68 | 6.56  |
| 2004 | D     | 6.60         | 0.49 | 6.31      | 0.50 | 19 | 5.34 | 7.45  |
| 2014 | D     | 6.85         | 0.53 | 6.55      | 0.52 | 19 | 5.55 | 7.73  |

**Table S5** Changes in vascular plant species richness in the periods 1994-2004, 1994-2014 and 2004-2014 on Mount Schrankogel. Effect sizes (estimate), 95% confidence interval (LCL and UCL) and p-values of the species richness per plot between the initial survey 1994 and the resurveys 2004 and 2014, derived from generalized linear mixed effect models with a penalized quasi-likelihood estimation and a Poisson distribution. For plot numbers per block see Table S1.

| Block | Hypothesis      | Estimate | LCL   | UCL  | p-value |
|-------|-----------------|----------|-------|------|---------|
| All   | 2004 - 1994 = 0 | 0.15     | 0.13  | 0.18 | <0.001  |
| All   | 2014 - 1994 = 0 | 0.19     | 0.16  | 0.21 | <0.001  |
| All   | 2014 - 2004 = 0 | 0.04     | 0.01  | 0.06 | <0.001  |
| A     | 2004 - 1994 = 0 | 0.21     | 0.17  | 0.25 | <0.001  |
| A     | 2014 - 1994 = 0 | 0.24     | 0.20  | 0.27 | <0.001  |
| A     | 2014 - 2004 = 0 | 0.03     | -0.01 | 0.06 | 0.152   |
| B     | 2004 - 1994 = 0 | 0.08     | 0.04  | 0.12 | <0.001  |
| B     | 2014 - 1994 = 0 | 0.14     | 0.10  | 0.18 | <0.001  |
| B     | 2014 - 2004 = 0 | 0.06     | 0.02  | 0.10 | 0.001   |
| C     | 2004 - 1994 = 0 | 0.10     | 0.06  | 0.15 | <0.001  |
| C     | 2014 - 1994 = 0 | 0.13     | 0.09  | 0.17 | <0.001  |
| C     | 2014 - 2004 = 0 | 0.03     | -0.02 | 0.07 | 0.300   |
| D     | 2004 - 1994 = 0 | 0.13     | 0.02  | 0.24 | 0.014   |
| D     | 2014 - 1994 = 0 | 0.17     | 0.06  | 0.27 | 0.001   |
| D     | 2014 - 2004 = 0 | 0.04     | -0.07 | 0.14 | 0.676   |

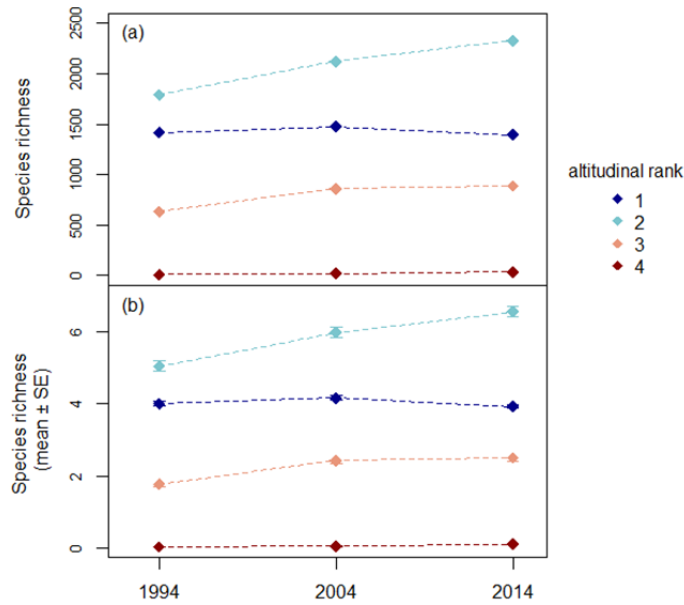

**Fig. S3** Vascular plant species richness per altitudinal rank in the survey years 1994, 2004 and 2014 on Mount Schrankogel. **a)** Sum of species counts over all 355 plots and **b)** mean and standard error of raw data of species richness per plot in each altitudinal rank. 1994-2004 and 1994-2014 were significantly different within altitudinal rank 2 and 3, respectively (generalized mixed effects models using penalized quasi likelihood and a negative binomial distribution; Tables S6, S7). For species numbers per altitudinal rank and year see Table S3.

**Table S6** Vascular plant species richness per altitudinal rank (AR) in the survey years 1994, 2004 and 2014 on Mount Schrankogel. **a)** Sum of species counts over all plots, mean and standard error (SE) of raw data and **b)** least-square mean (lsmean), standard error (SE), degrees of freedom (df) and 95% confidence interval (LCL and UCL), derived from generalized linear mixed effect models with a penalized quasi-likelihood estimation and a negative binomial distribution, of the species richness per plot and altitudinal rank in the three survey years. For species numbers per altitudinal rank and year see Table S3.

| Year | AR | (a) Raw data |      |      | (b) Model |      |    |      |      |
|------|----|--------------|------|------|-----------|------|----|------|------|
|      |    | sum          | mean | SE   | lsmean    | SE   | df | LCL  | UCL  |
| 1994 | 1  | 1418         | 3.99 | 0.06 | 3.65      | 0.32 | 3  | 2.77 | 4.81 |
| 2004 | 1  | 1478         | 4.16 | 0.06 | 3.82      | 0.33 | 3  | 2.90 | 5.05 |
| 2014 | 1  | 1394         | 3.93 | 0.06 | 3.62      | 0.32 | 3  | 2.74 | 4.77 |
| 1994 | 2  | 1790         | 5.04 | 0.14 | 4.62      | 0.40 | 3  | 3.50 | 6.09 |
| 2004 | 2  | 2122         | 5.98 | 0.14 | 5.36      | 0.47 | 3  | 4.06 | 7.06 |
| 2014 | 2  | 2329         | 6.56 | 0.14 | 5.83      | 0.51 | 3  | 4.42 | 7.69 |
| 1994 | 3  | 630          | 1.77 | 0.08 | 1.83      | 0.16 | 3  | 1.38 | 2.43 |
| 2004 | 3  | 860          | 2.42 | 0.10 | 2.33      | 0.20 | 3  | 1.76 | 3.08 |
| 2014 | 3  | 887          | 2.50 | 0.10 | 2.39      | 0.21 | 3  | 1.81 | 3.16 |
| 1994 | 4  | 10           | 0.03 | 0.01 | 1.09      | 0.20 | 3  | 0.60 | 1.98 |
| 2004 | 4  | 18           | 0.05 | 0.02 | 1.05      | 0.16 | 3  | 0.66 | 1.69 |
| 2014 | 4  | 34           | 0.10 | 0.02 | 1.14      | 0.14 | 3  | 0.77 | 1.69 |

**Table S7** Changes in vascular plant species richness per altitudinal rank (AR) in the periods 1994-2004, 1994-2014 and 2004-2014 on Mount Schrankogel. Effect sizes (estimate), 95% confidence interval (LCL and UCL) and p-values of the species richness per plot between the initial survey 1994 and the resurveys 2004 and 2014, derived from generalized linear mixed effect models with a penalized quasi-likelihood estimation and a negative binomial distribution. For species numbers per altitudinal rank and year see Table S3.

| AR | Hypothesis       | Estimate | LCL  | UCL  | p-value |
|----|------------------|----------|------|------|---------|
| 1  | 2004 - 1994 == 0 | 1.05     | 1.02 | 1.08 | 0.863   |
| 1  | 2014 - 1994 == 0 | 1.01     | 0.98 | 1.04 | 1.000   |
| 1  | 2014 - 2004 == 0 | 1.06     | 1.03 | 1.09 | 0.684   |
| 2  | 2004 - 1994 == 0 | 1.16     | 1.13 | 1.19 | <.0001  |
| 2  | 2014 - 1994 == 0 | 1.26     | 1.23 | 1.30 | <.0001  |
| 2  | 2014 - 2004 == 0 | 1.09     | 1.06 | 1.12 | 0.070   |
| 3  | 2004 - 1994 == 0 | 1.27     | 1.23 | 1.31 | <.0001  |
| 3  | 2014 - 1994 == 0 | 1.30     | 1.26 | 1.35 | <.0001  |
| 3  | 2014 - 2004 == 0 | 1.03     | 0.99 | 1.06 | 1.000   |
| 4  | 2004 - 1994 == 0 | 1.04     | 0.85 | 1.24 | 1.000   |
| 4  | 2014 - 1994 == 0 | 1.04     | 0.83 | 1.25 | 1.000   |
| 4  | 2014 - 2004 == 0 | 1.08     | 0.92 | 1.24 | 1.000   |

## Colonisations and disappearances

**Table S8** Number of colonising and disappearing vascular plant species at the end of the periods 1994-2004 and 2004-2014 on Mount Schrankogel. **a)** Mean and standard error (SE) of raw data and **b)** least-square mean (lsmean), standard error (SE) and asymptotic confidence interval (LCL and UCL), derived from negative binomial generalized linear mixed-effects models, of numbers of colonising and disappearing species per plot between the initial survey 1994 and the resurveys 2004 and 2014. For plot numbers per block see Table S1.

| Type           | Year | Block | (a) Raw data |      | (b) Model |      |      |      |
|----------------|------|-------|--------------|------|-----------|------|------|------|
|                |      |       | mean         | SE   | lsmean    | SE   | LCL  | UCL  |
| Colonisations  | 2004 | All   | 2.08         | 0.09 | 1.58      | 0.31 | 1.07 | 2.33 |
| Disappearances | 2004 | All   | 0.31         | 0.03 | 0.23      | 0.05 | 0.15 | 0.36 |
| Colonisations  | 2014 | All   | 1.76         | 0.08 | 1.34      | 0.27 | 0.91 | 1.99 |
| Disappearances | 2014 | All   | 1.29         | 0.07 | 0.98      | 0.20 | 0.66 | 1.45 |
| Colonisations  | 2004 | A     | 2.94         | 0.14 | 2.90      | 0.17 | 2.58 | 3.27 |
| Disappearances | 2004 | A     | 0.25         | 0.04 | 0.25      | 0.04 | 0.18 | 0.34 |
| Colonisations  | 2014 | A     | 2.12         | 0.12 | 2.09      | 0.14 | 1.83 | 2.38 |
| Disappearances | 2014 | A     | 1.73         | 0.12 | 1.71      | 0.12 | 1.49 | 1.96 |
| Colonisations  | 2004 | B     | 1.22         | 0.10 | 1.06      | 0.21 | 0.71 | 1.57 |
| Disappearances | 2004 | B     | 0.37         | 0.05 | 0.32      | 0.08 | 0.20 | 0.51 |
| Colonisations  | 2014 | B     | 1.53         | 0.13 | 1.33      | 0.26 | 0.90 | 1.97 |
| Disappearances | 2014 | B     | 0.90         | 0.10 | 0.79      | 0.16 | 0.52 | 1.18 |
| Colonisations  | 2004 | C     | 1.88         | 0.22 | 1.84      | 0.21 | 1.48 | 2.29 |
| Disappearances | 2004 | C     | 0.40         | 0.09 | 0.39      | 0.09 | 0.25 | 0.61 |
| Colonisations  | 2014 | C     | 1.52         | 0.18 | 1.49      | 0.18 | 1.17 | 1.90 |
| Disappearances | 2014 | C     | 1.10         | 0.18 | 1.08      | 0.15 | 0.82 | 1.43 |
| Colonisations  | 2004 | D     | 0.95         | 0.25 | 0.95      | 0.22 | 0.61 | 1.49 |
| Disappearances | 2004 | D     | 0.15         | 0.11 | 0.15      | 0.09 | 0.05 | 0.47 |
| Colonisations  | 2014 | D     | 0.80         | 0.17 | 0.80      | 0.20 | 0.49 | 1.31 |
| Disappearances | 2014 | D     | 0.55         | 0.15 | 0.55      | 0.17 | 0.30 | 0.99 |



**Table S9** Differences between numbers of colonising and disappearing vascular plant species within and among the periods 1994-2004 and 2004-2014 on Mount Schrankogel. Effect sizes (estimate), 95% confidence interval (LCL and UCL) and p-values of differences of numbers of colonising and disappearing species per plot over the entire study area and for each block between 1994, 2004 and 2014, derived from negative binomial generalized linear mixed-effects models with an ANOVA likelihood ratio test. For plot numbers per block see Table S1.

| Block | Hypothesis                                     | Estimate | LCL   | UCL   | p-value |
|-------|------------------------------------------------|----------|-------|-------|---------|
| All   | colonisations 2004 - colonisations 2014 == 0   | 0.16     | 0.01  | 0.31  | 0.03    |
| All   | disappearances 2004 - disappearances 2014 == 0 | -1.43    | -1.71 | -1.15 | 0.001   |
| All   | disappearances 2004 - colonisations 2004 == 0  | -1.91    | -2.17 | -1.64 | 0.001   |
| All   | disappearances 2014 - colonisations 2014 == 0  | -0.32    | -0.48 | -0.15 | 0.001   |
| All   | colonisations 2004 - disappearances 2014 == 0  | 0.48     | 0.31  | 0.64  | 0.001   |
| All   | disappearances 2004 - colonisations 2014 == 0  | -1.75    | -2.02 | -1.48 | 0.001   |
| A     | colonisations 2004 - colonisations 2014 == 0   | 0.33     | 0.15  | 0.51  | 0.001   |
| A     | disappearances 2004 - disappearances 2014 == 0 | -1.93    | -2.35 | -1.51 | 0.001   |
| A     | disappearances 2004 - colonisations 2004 == 0  | -2.46    | -2.87 | -2.05 | 0.001   |
| A     | disappearances 2014 - colonisations 2014 == 0  | -0.2     | -0.4  | 0     | 0.052   |
| A     | colonisations 2004 - disappearances 2014 == 0  | 0.53     | 0.34  | 0.72  | 0.001   |
| A     | disappearances 2004 - colonisations 2014 == 0  | -2.13    | -2.55 | -1.71 | 0.001   |
| B     | colonisations 2004 - colonisations 2014 == 0   | -0.23    | -0.5  | 0.05  | 0.138   |
| B     | disappearances 2004 - disappearances 2014 == 0 | -0.89    | -1.33 | -0.45 | 0.001   |
| B     | disappearances 2004 - colonisations 2004 == 0  | -1.19    | -1.61 | -0.76 | 0.001   |
| B     | disappearances 2014 - colonisations 2014 == 0  | -0.53    | -0.83 | -0.23 | 0.001   |
| B     | colonisations 2004 - disappearances 2014 == 0  | 0.3      | -0.02 | 0.61  | 0.07    |
| B     | disappearances 2004 - colonisations 2014 == 0  | -1.42    | -1.83 | -1    | 0.001   |
| C     | colonisations 2004 - colonisations 2014 == 0   | 0.21     | -0.19 | 0.61  | 0.534   |
| C     | disappearances 2004 - disappearances 2014 == 0 | -1.03    | -1.71 | -0.34 | 0.001   |
| C     | disappearances 2004 - colonisations 2004 == 0  | -1.56    | -2.2  | -0.91 | 0.001   |
| C     | disappearances 2014 - colonisations 2014 == 0  | -0.32    | -0.78 | 0.14  | 0.276   |
| C     | colonisations 2004 - disappearances 2014 == 0  | 0.53     | 0.09  | 0.97  | 0.011   |
| C     | disappearances 2004 - colonisations 2014 == 0  | -1.35    | -2    | -0.69 | 0.001   |
| D     | colonisations 2004 - colonisations 2014 == 0   | 0.17     | -0.69 | 1.04  | 0.956   |
| D     | disappearances 2004 - disappearances 2014 == 0 | -1.3     | -2.96 | 0.36  | 0.181   |
| D     | disappearances 2004 - colonisations 2004 == 0  | -1.85    | -3.43 | -0.26 | 0.015   |
| D     | disappearances 2014 - colonisations 2014 == 0  | -0.37    | -1.37 | 0.62  | 0.765   |
| D     | colonisations 2004 - disappearances 2014 == 0  | 0.55     | -0.42 | 1.51  | 0.46    |
| D     | disappearances 2004 - colonisations 2014 == 0  | -1.67    | -3.28 | -0.07 | 0.036   |

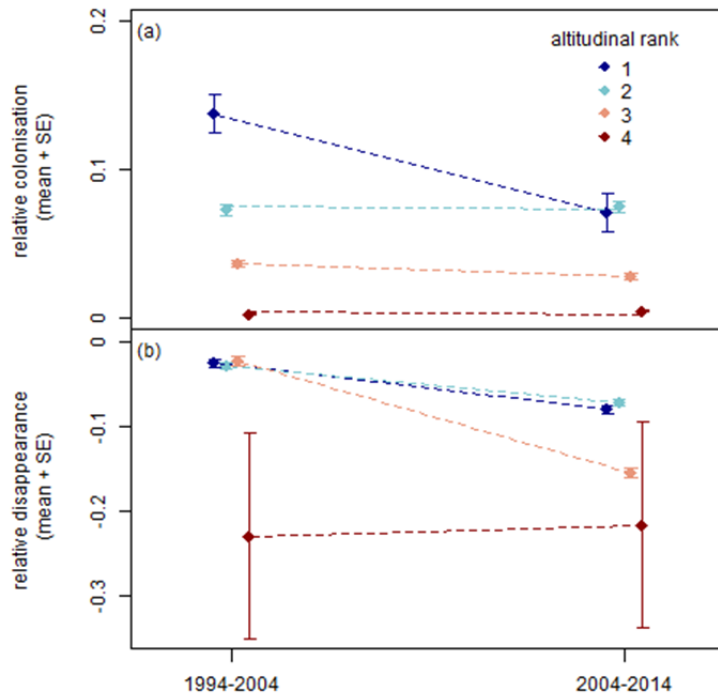

**Fig. S4** Relative colonisation and disappearance per altitudinal rank (AR) in the periods 1994–2004 and 2004–2014 on Mount Schrankogel. Shown are mean and standard error (SE) per species in each AR for a) relative colonisations and b) relative disappearances (Table S10). Relative colonisations of AR1 were significantly different between 1994–2004 and 2004–2014. Relative disappearances were all significantly different between both periods except for AR4 (Table S11). For species numbers per altitudinal rank see Table S3.

**Table S10** Relative colonisation and disappearance per altitudinal rank (AR) in the periods 1994–2004 and 2004–2014 on Mount Schrankogel. a) Mean and standard error (SE) of raw data and b) least-square mean (lsmean), standard error (SE) and 95% confidence interval (LCL and UCL), derived from generalized linear mixed effect models with function glmmadmb and a binomial distribution, of relative colonisation events per unoccupied plot and relative disappearance events per occupied plot for each species in different altitudinal ranks during two periods. For species numbers per altitudinal rank see Table S3.

| Period    | Type          | AR | (a) Raw data |      | (b) Model |      |       |       |
|-----------|---------------|----|--------------|------|-----------|------|-------|-------|
|           |               |    | mean         | SE   | lsmean    | SE   | LCL   | UCL   |
| 1994-2004 | Colonisation  | 1  | 0.14         | 0.01 | 0.17      | 2.23 | 0.03  | 0.82  |
| 2004-2014 | Colonisation  | 1  | 0.07         | 0.01 | 0.08      | 2.16 | 0.02  | 0.37  |
| 1994-2004 | Colonisation  | 2  | 0.07         | 0.00 | 0.03      | 2.84 | 0.00  | 0.25  |
| 2004-2014 | Colonisation  | 2  | 0.07         | 0.00 | 0.04      | 2.81 | 0.01  | 0.31  |
| 1994-2004 | Colonisation  | 3  | 0.04         | 0.00 | 0.01      | 2.93 | 0.00  | 0.06  |
| 2004-2014 | Colonisation  | 3  | 0.03         | 0.00 | 0.01      | 2.90 | 0.00  | 0.05  |
| 1994-2004 | Colonisation  | 4  | 0.00         | 0.00 | 0.00      | 4.13 | 0.00  | 0.01  |
| 2004-2014 | Colonisation  | 4  | 0.00         | 0.00 | 0.00      | 3.49 | 0.00  | 0.01  |
| 1994-2004 | Disappearance | 1  | -0.03        | 0.00 | -0.02     | 1.64 | -0.05 | -0.01 |
| 2004-2014 | Disappearance | 1  | -0.08        | 0.01 | -0.06     | 1.55 | -0.15 | -0.03 |
| 1994-2004 | Disappearance | 2  | -0.03        | 0.00 | -0.04     | 2.00 | -0.15 | -0.01 |
| 2004-2014 | Disappearance | 2  | -0.07        | 0.01 | -0.10     | 1.78 | -0.32 | -0.03 |
| 1994-2004 | Disappearance | 3  | -0.02        | 0.01 | -0.02     | 2.07 | -0.10 | -0.01 |
| 2004-2014 | Disappearance | 3  | -0.16        | 0.01 | -0.17     | 1.70 | -0.49 | -0.06 |
| 1994-2004 | Disappearance | 4  | -0.23        | 0.12 | -0.22     | 3.31 | -2.27 | -0.02 |
| 2004-2014 | Disappearance | 4  | -0.22        | 0.09 | -0.19     | 2.16 | -0.87 | -0.04 |

**Table S11** Changes in relative colonisation and disappearance per altitudinal rank (AR) in the periods 1994-2004 and 2004-2014 on Mount Schrankogel. Mean changes (Odds ratio) in relative colonisation and disappearance events between the periods 1994 -2004 and 2004 -2014 with standard error (SE), z-ratio and p-value, derived from generalized linear mixed-effects models with the function *glmmadmb* and likelihood ratio tests. For species numbers per altitudinal rank see Table S3.

| AR | Type          | Contrast                   | Odds ratio | SE   | z-ratio | p-value |
|----|---------------|----------------------------|------------|------|---------|---------|
| 1  | Colonisation  | 1994 – 2004 == 2004 – 2014 | 2.05       | 0.42 | 3.50    | 0.01    |
| 2  | Colonisation  | 2004 – 2014 == 1994 – 2004 | 1.27       | 0.18 | 1.70    | 0.69    |
| 3  | Colonisation  | 1994 – 2004 == 2004 – 2014 | 1.06       | 0.16 | 0.40    | 1.00    |
| 4  | Colonisation  | 2004 – 2014 == 1994 – 2004 | 1.93       | 1.16 | 1.10    | 0.96    |
| 1  | Disappearance | 2004 – 2014 == 1994 – 2004 | 3.23       | 0.62 | 6.15    | <.0001  |
| 2  | Disappearance | 2004 – 2014 == 1994 – 2004 | 2.65       | 0.84 | 3.08    | 0.04    |
| 3  | Disappearance | 2004 – 2014 == 1994 – 2004 | 6.90       | 2.73 | 4.88    | <.0001  |
| 4  | Disappearance | 1994 – 2004 == 2004 – 2014 | 1.12       | 1.04 | 0.13    | 1.00    |

## Vascular plant cover

**Table S12** Cover sum of vascular plant species in the survey years 1994, 2004 and 2014 on Mount Schrankogel. **a)** Mean and standard error (SE) of raw data and **b)** least-square mean (lsmean), standard error (SE), degrees of freedom (df) and 95% confidence interval (LCL and UCL) derived from linear mixed effects models, of the cover sum of the vascular plant species per plot in the three survey years. For plot numbers per block see Table S1.

| Year | Block | (a) Raw data |      | (b) Model |      |       |        |       |
|------|-------|--------------|------|-----------|------|-------|--------|-------|
|      |       | mean         | SE   | lsmean    | SE   | df    | LCL    | UCL   |
| 1994 | All   | 24.33        | 0.95 | 25.28     | 2.76 | 13.90 | 19.36  | 31.19 |
| 2004 | All   | 21.90        | 0.78 | 22.79     | 2.76 | 13.90 | 16.88  | 28.71 |
| 2014 | All   | 20.83        | 0.74 | 21.78     | 2.76 | 13.90 | 15.86  | 27.70 |
| 1994 | A     | 27.91        | 1.56 | 29.93     | 4.95 | 2.95  | 14.03  | 45.83 |
| 2004 | A     | 25.11        | 1.32 | 27.00     | 4.95 | 2.95  | 11.10  | 42.90 |
| 2014 | A     | 24.70        | 1.25 | 26.72     | 4.95 | 2.95  | 10.82  | 42.62 |
| 1994 | B     | 21.27        | 1.43 | 24.19     | 5.71 | 3.03  | 6.10   | 42.28 |
| 2004 | B     | 18.50        | 1.09 | 21.42     | 5.71 | 3.03  | 3.33   | 39.50 |
| 2014 | B     | 16.55        | 1.04 | 19.46     | 5.71 | 3.03  | 1.38   | 37.55 |
| 1994 | C     | 24.79        | 1.96 | 23.86     | 5.91 | 1.01  | -48.61 | 96.33 |
| 2004 | C     | 23.46        | 1.51 | 22.53     | 5.91 | 1.01  | -49.94 | 95.01 |
| 2014 | C     | 21.40        | 1.36 | 20.47     | 5.91 | 1.01  | -52.01 | 92.94 |
| 1994 | D     | 12.96        | 2.68 | 21.54     | 5.73 | 5.22  | 7.00   | 36.09 |
| 2004 | D     | 13.15        | 2.44 | 21.73     | 5.73 | 5.22  | 7.19   | 36.28 |
| 2014 | D     | 14.47        | 2.39 | 23.06     | 5.73 | 5.22  | 8.51   | 37.60 |

**Table S13** Changes in cover sum of vascular plant species in the periods 1994-2004, 1994-2014 and 2004-2014 on Mount Schrankogel. Effect sizes (estimate), 95% confidence interval (LCL and UCL) and p-values of the cover sum of the vascular plant species per plot between the initial survey 1994 and the resurveys 2004 and 2014, derived from linear mixed effects models. For plot numbers per block see Table S1.

| Block | Hypothesis       | Estimate | LCL   | UCL   | p-value |
|-------|------------------|----------|-------|-------|---------|
| All   | 2004 - 1994 == 0 | -2.48    | -2.91 | -2.05 | 0.000   |
| All   | 2014 - 1994 == 0 | -3.50    | -3.92 | -3.07 | 0.000   |
| All   | 2014 - 2004 == 0 | -1.01    | -1.44 | -0.59 | 0.047   |
| A     | 2004 - 1994 == 0 | -2.94    | -3.66 | -2.21 | 0.000   |
| A     | 2014 - 1994 == 0 | -3.21    | -3.93 | -2.49 | 0.000   |
| A     | 2014 - 2004 == 0 | -0.27    | -1.00 | 0.45  | 0.924   |
| B     | 2004 - 1994 == 0 | -2.77    | -3.40 | -2.14 | 0.000   |
| B     | 2014 - 1994 == 0 | -4.72    | -5.35 | -4.09 | 0.000   |
| B     | 2014 - 2004 == 0 | -1.95    | -2.58 | -1.32 | 0.006   |
| C     | 2004 - 1994 == 0 | -1.33    | -2.21 | -0.44 | 0.295   |
| C     | 2014 - 1994 == 0 | -3.39    | -4.28 | -2.51 | 0.001   |
| C     | 2014 - 2004 == 0 | -2.07    | -2.95 | -1.18 | 0.055   |
| D     | 2004 - 1994 == 0 | 0.19     | -1.31 | 1.68  | 0.991   |
| D     | 2014 - 1994 == 0 | 1.51     | 0.02  | 3.01  | 0.574   |
| D     | 2014 - 2004 == 0 | 1.32     | -0.17 | 2.82  | 0.652   |

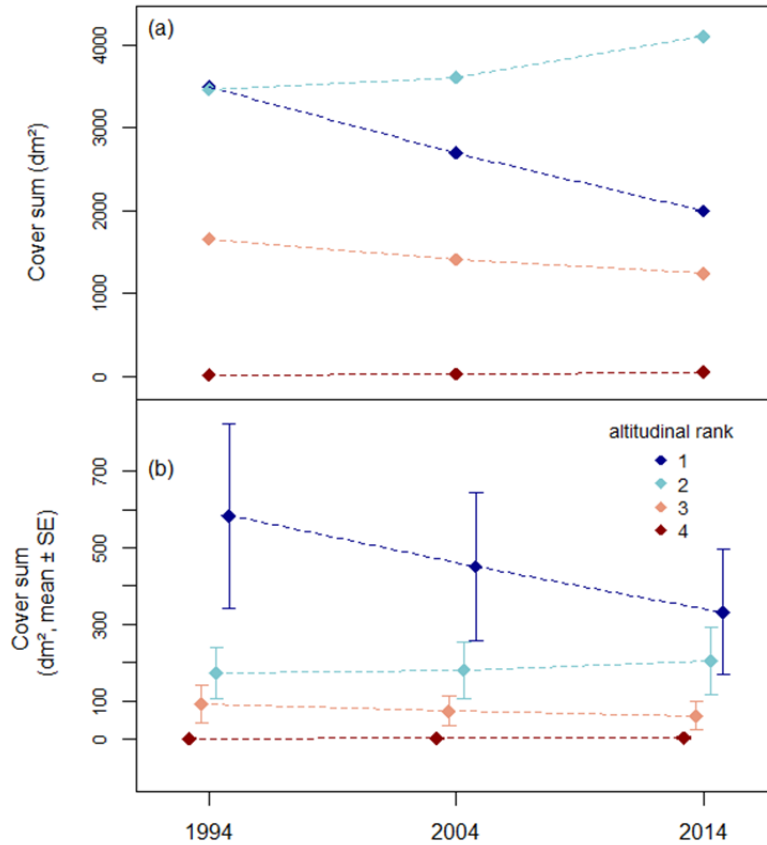

**Fig. S5** Cover sum of vascular plant species per altitudinal rank (AR) in the survey years 1994, 2004 and 2014 on Mount Schrankogel. **a)** Cover sum over all 355 plots for all species combined in each AR group, and **b)** mean and standard error of raw data of cover sum per species in each altitudinal rank (Table S14). In **b)** only the three years within altitudinal rank 1 were significantly different (linear mixed effects models; Table S15). For species numbers per altitudinal rank and year see Table S3.

**Table S14** Cover sum of vascular plant species per altitudinal rank (AR) in the survey years 1994, 2004 and 2014 on Mount Schrankogel. **a)** Cover sum (dm<sup>2</sup>) over all plots, mean and standard error (SE) of raw data and **b)** least-square mean (lsmean), standard error (SE), degrees of freedom (df) and 95% confidence interval (LCL and UCL) derived from linear mixed effects models, of the cover sum per vascular plant species in the three survey years. For species numbers per altitudinal rank and year see Table S3.

| Year | AR | (a) Raw data |        |        | (b) Model |        |    |         |        |
|------|----|--------------|--------|--------|-----------|--------|----|---------|--------|
|      |    | sum          | mean   | SE     | lsmean    | SE     | df | LCL     | UCL    |
| 1994 | 1  | 3496.73      | 582.79 | 240.35 | 582.79    | 109.56 | 60 | 363.66  | 801.92 |
| 2004 | 1  | 2704.51      | 450.75 | 194.68 | 450.75    | 109.56 | 60 | 231.62  | 669.88 |
| 2014 | 1  | 1995.14      | 332.52 | 163.36 | 332.52    | 109.56 | 60 | 113.39  | 551.65 |
| 1994 | 2  | 3465.12      | 173.26 | 67.70  | 173.26    | 60.01  | 60 | 53.23   | 293.28 |
| 2004 | 2  | 3611.52      | 180.58 | 73.72  | 180.58    | 60.01  | 60 | 60.55   | 300.60 |
| 2014 | 2  | 4107.83      | 205.39 | 87.19  | 205.39    | 60.01  | 60 | 85.37   | 325.41 |
| 1994 | 3  | 1659.93      | 92.22  | 50.82  | 82.35     | 58.95  | 62 | -35.50  | 200.19 |
| 2004 | 3  | 1409.16      | 74.17  | 39.33  | 68.25     | 58.82  | 61 | -49.35  | 185.85 |
| 2014 | 3  | 1243.54      | 62.18  | 35.64  | 58.91     | 58.68  | 61 | -58.44  | 176.26 |
| 1994 | 4  | 13.76        | 2.29   | 1.14   | -1.81     | 75.35  | 72 | -152.00 | 148.38 |
| 2004 | 4  | 26.50        | 3.31   | 1.71   | 1.30      | 73.79  | 67 | -145.98 | 148.59 |
| 2014 | 4  | 47.87        | 3.68   | 2.48   | 3.83      | 71.97  | 61 | -140.08 | 147.74 |

**Table S15** Changes in mean cover sum of vascular plant species per altitudinal rank (AR) in the periods 1994-2004, 1994-2014 and 2004-2014 on Mount Schrankogel. Effect sizes (estimate), 95% confidence interval (LCL and UCL) and p-values of the mean cover sum (dm<sup>2</sup>) of the vascular plant species per AR between the initial survey 1994 and the resurveys 2004 and 2014, derived from linear mixed effects models. For species numbers per altitudinal rank and year see Table S3.

| AR | Hypothesis       | Estimate | LCL     | UCL     | p-value |
|----|------------------|----------|---------|---------|---------|
| 1  | 2004 - 1994 == 0 | -132.04  | -163.79 | -100.28 | 0.004   |
| 1  | 2014 - 1994 == 0 | -250.26  | -282.02 | -218.51 | <.0001  |
| 1  | 2014 - 2004 == 0 | -118.23  | -149.99 | -86.47  | 0.017   |
| 2  | 2004 - 1994 == 0 | 7.32     | -10.07  | 24.71   | 1.000   |
| 2  | 2014 - 1994 == 0 | 32.14    | 14.74   | 49.53   | 0.787   |
| 2  | 2014 - 2004 == 0 | 24.82    | 7.42    | 42.21   | 0.955   |
| 3  | 2004 - 1994 == 0 | -14.09   | -32.42  | 4.23    | 1.000   |
| 3  | 2014 - 1994 == 0 | -23.44   | -41.75  | -5.12   | 0.980   |
| 3  | 2014 - 2004 == 0 | -9.34    | -27.65  | 8.96    | 1.000   |
| 4  | 2004 - 1994 == 0 | 3.11     | -29.87  | 36.09   | 1.000   |
| 4  | 2014 - 1994 == 0 | 5.64     | -27.21  | 38.48   | 1.000   |
| 4  | 2014 - 2004 == 0 | 2.53     | -24.86  | 29.91   | 1.000   |

## Changes in community-based ecological indicators

### Thermic indicator

**Table S16** Thermic indicator in the survey years 1994, 2004 and 2014 on Mount Schrankogel. Least-square mean (lsmean), standard error (SE), degrees of freedom (df, rounded to the nearest integer) and 95% confidence interval (LCL and UCL) of the thermic indicator per plot in the three survey years. As a proxy for the thermal preferences of a species the altitudinal rank (1 = subnival-nival, 2 = alpine-subnival, 3 = alpine, 4 = treeline-alpine species; Gottfried et al., 2012) was used. Data were analysed with linear mixed-effects models. For plot numbers per block see Table S1.

| Year | Block | lsmean | SE   | df | LCL   | UCL  |
|------|-------|--------|------|----|-------|------|
| 1994 | All   | 1.61   | 0.15 | 5  | 1.23  | 1.99 |
| 2004 | All   | 1.67   | 0.15 | 5  | 1.29  | 2.06 |
| 2014 | All   | 1.76   | 0.15 | 5  | 1.38  | 2.14 |
| 1994 | A     | 1.61   | 0.19 | 4  | 1.08  | 2.14 |
| 2004 | A     | 1.69   | 0.19 | 4  | 1.16  | 2.22 |
| 2014 | A     | 1.80   | 0.19 | 4  | 1.27  | 2.33 |
| 1994 | B     | 1.90   | 0.14 | 3  | 1.44  | 2.35 |
| 2004 | B     | 1.94   | 0.14 | 3  | 1.48  | 2.39 |
| 2014 | B     | 2.01   | 0.14 | 3  | 1.55  | 2.46 |
| 1994 | C     | 1.79   | 0.27 | 1  | -1.61 | 5.19 |
| 2004 | C     | 1.85   | 0.27 | 1  | -1.56 | 5.25 |
| 2014 | C     | 1.92   | 0.27 | 1  | -1.48 | 5.32 |
| 1994 | D     | 1.19   | 0.06 | 21 | 1.05  | 1.32 |
| 2004 | D     | 1.23   | 0.06 | 21 | 1.09  | 1.37 |
| 2014 | D     | 1.25   | 0.06 | 21 | 1.12  | 1.39 |

**Table S17** Thermophilisation in the periods 1994-2004, 1994-2014 and 2004-2014 on Mount Schrankogel. Mean changes (estimate) in thermic indicator ( $\Delta$  thermic indicator = thermophilisation) between 1994 and 2004, 1994 and 2014, and 2004 and 2014, with standard error (SE), 95% confidence interval (LCL and UCL) and p-value, derived from linear mixed-effects models and likelihood ratio tests. For plot numbers per block see Table S1.

| Block | Hypothesis      | Estimate | SE   | LCL   | UCL  | p-value |
|-------|-----------------|----------|------|-------|------|---------|
| All   | 2004 - 1994 = 0 | 0.06     | 0.01 | 0.04  | 0.08 | <0.001  |
| All   | 2014 - 1994 = 0 | 0.15     | 0.01 | 0.13  | 0.17 | <0.001  |
| All   | 2014 - 2004 = 0 | 0.09     | 0.01 | 0.07  | 0.11 | <0.001  |
| A     | 2004 - 1994 = 0 | 0.08     | 0.01 | 0.05  | 0.11 | <0.001  |
| A     | 2014 - 1994 = 0 | 0.19     | 0.01 | 0.16  | 0.22 | <0.001  |
| A     | 2014 - 2004 = 0 | 0.11     | 0.01 | 0.08  | 0.14 | <0.001  |
| B     | 2004 - 1994 = 0 | 0.04     | 0.01 | 0.01  | 0.07 | 0.015   |
| B     | 2014 - 1994 = 0 | 0.11     | 0.01 | 0.08  | 0.14 | 0.001   |
| B     | 2014 - 2004 = 0 | 0.07     | 0.01 | 0.04  | 0.11 | 0.001   |
| C     | 2004 - 1994 = 0 | 0.06     | 0.02 | 0.02  | 0.10 | 0.003   |
| C     | 2014 - 1994 = 0 | 0.13     | 0.02 | 0.09  | 0.17 | 0.001   |
| C     | 2014 - 2004 = 0 | 0.07     | 0.02 | 0.03  | 0.11 | 0.001   |
| D     | 2004 - 1994 = 0 | 0.04     | 0.02 | -0.01 | 0.10 | 0.138   |
| D     | 2014 - 1994 = 0 | 0.06     | 0.02 | 0.01  | 0.12 | 0.015   |
| D     | 2014 - 2004 = 0 | 0.02     | 0.02 | -0.03 | 0.07 | 0.651   |

**Table S18** Changes in thermophilisation between the periods 1994-2004 and 2004-2014 on Mount Schrankogel. Effect sizes (estimate) of changes in thermophilisation ( $\Delta$  thermic indicator) from the first (1994-2004) to the second (2004-2014) decade of survey, with 95% confidence interval (LCL and UCL) and p-value, derived from linear mixed-effects models and likelihood ratio test. For plot numbers per block see Table S1.

| Block | Estimate | LCL   | UCL  | p-value |
|-------|----------|-------|------|---------|
| All   | 0.03     | 0.01  | 0.05 | 0.009   |
| A     | 0.03     | -0.01 | 0.06 | 0.108   |
| B     | 0.04     | 0.01  | 0.07 | 0.020   |
| C     | 0.02     | -0.02 | 0.06 | 0.429   |
| D     | -0.02    | -0.07 | 0.03 | 0.344   |

## Soil moisture indicator

**Table S19** Soil moisture indicator in the survey years 1994, 2004 and 2014 on Mount Schrankogel. Least-square mean (lsmean), standard error (SE), rounded degrees of freedom (df) and 95% confidence interval (LCL and UCL) of the soil moisture indicator per plot in the three survey years. As a proxy for the soil moisture preferences of a species the indicator value for soil moisture (1 = very dry to 4 = very moist; Landolt et al., 2010) was used. Data were analysed with linear mixed-effects models. For plot numbers per block see Table S1.

| Year | Block | lsmean | SE   | df | LCL  | UCL  |
|------|-------|--------|------|----|------|------|
| 1994 | All   | 2.95   | 0.13 | 5  | 2.62 | 3.27 |
| 2004 | All   | 2.89   | 0.13 | 5  | 2.57 | 3.22 |
| 2014 | All   | 2.79   | 0.13 | 5  | 2.46 | 3.12 |
| 1994 | A     | 2.97   | 0.10 | 4  | 2.68 | 3.26 |
| 2004 | A     | 2.92   | 0.10 | 4  | 2.63 | 3.21 |
| 2014 | A     | 2.77   | 0.10 | 4  | 2.49 | 3.06 |
| 1994 | B     | 2.79   | 0.14 | 3  | 2.35 | 3.24 |
| 2004 | B     | 2.75   | 0.14 | 3  | 2.31 | 3.20 |
| 2014 | B     | 2.68   | 0.14 | 3  | 2.24 | 3.12 |
| 1994 | C     | 2.68   | 0.14 | 1  | 1.01 | 4.36 |
| 2004 | C     | 2.60   | 0.14 | 1  | 0.92 | 4.27 |
| 2014 | C     | 2.53   | 0.14 | 1  | 0.86 | 4.20 |
| 1994 | D     | 3.32   | 0.06 | 23 | 3.20 | 3.44 |
| 2004 | D     | 3.27   | 0.06 | 23 | 3.15 | 3.39 |
| 2014 | D     | 3.20   | 0.06 | 23 | 3.08 | 3.32 |

**Table S20** Change in soil moisture indicator in the periods 1994-2004, 1994-2014 and 2004-2014 on Mount Schrankogel. Least-square mean changes (estimate) in soil moisture indicator between 1994 and 2004, 1994 and 2014, and 2004 and 2014, with standard error (SE), 95% confidence interval (LCL and UCL) and p-value, derived from linear mixed-effects models and likelihood ratio test. For plot numbers per block see Table S1.

| Block | Hypothesis      | Estimate | SE   | LCL   | UCL   | p-value |
|-------|-----------------|----------|------|-------|-------|---------|
| All   | 2004 - 1994 = 0 | -0.05    | 0.01 | -0.07 | -0.03 | <0.001  |
| All   | 2014 - 1994 = 0 | -0.16    | 0.01 | -0.18 | -0.14 | <0.001  |
| All   | 2014 - 2004 = 0 | -0.11    | 0.01 | -0.13 | -0.08 | <0.001  |
| A     | 2004 - 1994 = 0 | -0.05    | 0.02 | -0.09 | -0.01 | 0.003   |
| A     | 2014 - 1994 = 0 | -0.20    | 0.02 | -0.24 | -0.16 | 0.001   |
| A     | 2014 - 2004 = 0 | -0.15    | 0.02 | -0.19 | -0.11 | 0.001   |
| B     | 2004 - 1994 = 0 | -0.04    | 0.01 | -0.07 | -0.01 | 0.001   |
| B     | 2014 - 1994 = 0 | -0.11    | 0.01 | -0.14 | -0.08 | <0.001  |
| B     | 2014 - 2004 = 0 | -0.07    | 0.01 | -0.10 | -0.04 | <0.001  |
| C     | 2004 - 1994 = 0 | -0.08    | 0.02 | -0.13 | -0.03 | 0.001   |
| C     | 2014 - 1994 = 0 | -0.15    | 0.02 | -0.20 | -0.10 | 0.001   |
| C     | 2014 - 2004 = 0 | -0.07    | 0.02 | -0.12 | -0.02 | 0.004   |
| D     | 2004 - 1994 = 0 | -0.05    | 0.03 | -0.13 | 0.02  | 0.206   |
| D     | 2014 - 1994 = 0 | -0.12    | 0.03 | -0.19 | -0.04 | <0.001  |
| D     | 2014 - 2004 = 0 | -0.07    | 0.03 | -0.14 | 0.01  | 0.098   |

**Table S21** Changes in  $\Delta$  soil moisture indicator between the periods 1994-2004 and 2004-2014 on Mount Schrankogel. Effect sizes (estimate) of  $\Delta$  soil moisture indicator from the first (1994-2004) to the second (2004-2014) decade of survey, with 95% confidence intervals (LCL and UCL) and p-value, derived from linear mixed-effects models and likelihood ratio test. For plot numbers per block see Table S1.

| Block | Estimate | LCL   | UCL   | p-value |
|-------|----------|-------|-------|---------|
| All   | -0.05    | -0.07 | -0.03 | <0.001  |
| A     | -0.10    | -0.13 | -0.06 | <0.001  |
| B     | -0.03    | -0.05 | -0.01 | 0.016   |
| C     | 0.01     | -0.03 | 0.06  | 0.543   |
| D     | -0.01    | -0.06 | 0.04  | 0.638   |

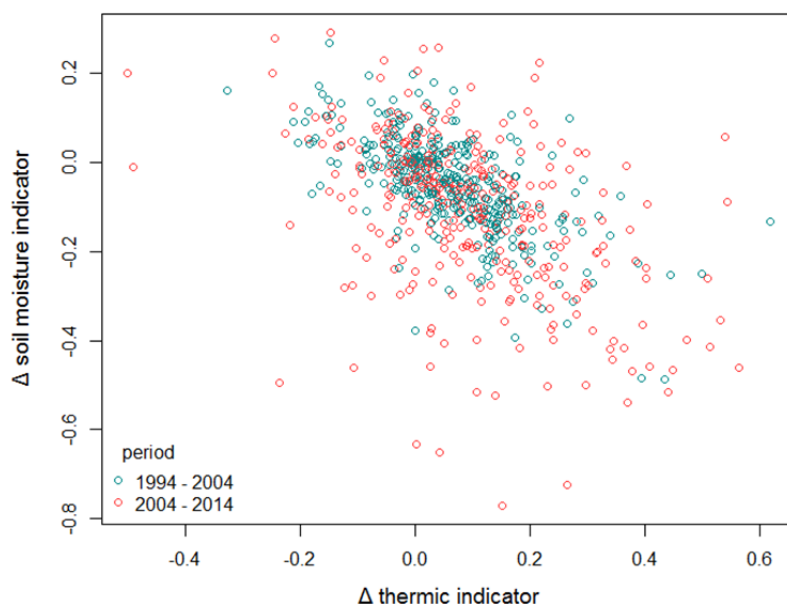

**Fig. S6** Correlation between the changes of thermal indicator and changes of soil moisture indicator per plot in the periods 1994-2004 and 2004-2014 on Mount Schrankogel. The thermal indicator per plot was calculated as the mean altitudinal rank (1 = subnival-nival, 2 = alpine-subnival, 3 = alpine, 4 = treeline-alpine species) weighted with the respective species' cover (Gottfried et al., 2012). The soil moisture indicator per plot was calculated as the mean of indicator values for soil moisture (1 = very dry to 4 = very moist; Landolt et al., 2010) weighted with the respective species' cover. The correlation was highly significant (linear mixed effect model;  $p < 0.0001$ ).

## Topography and elevation

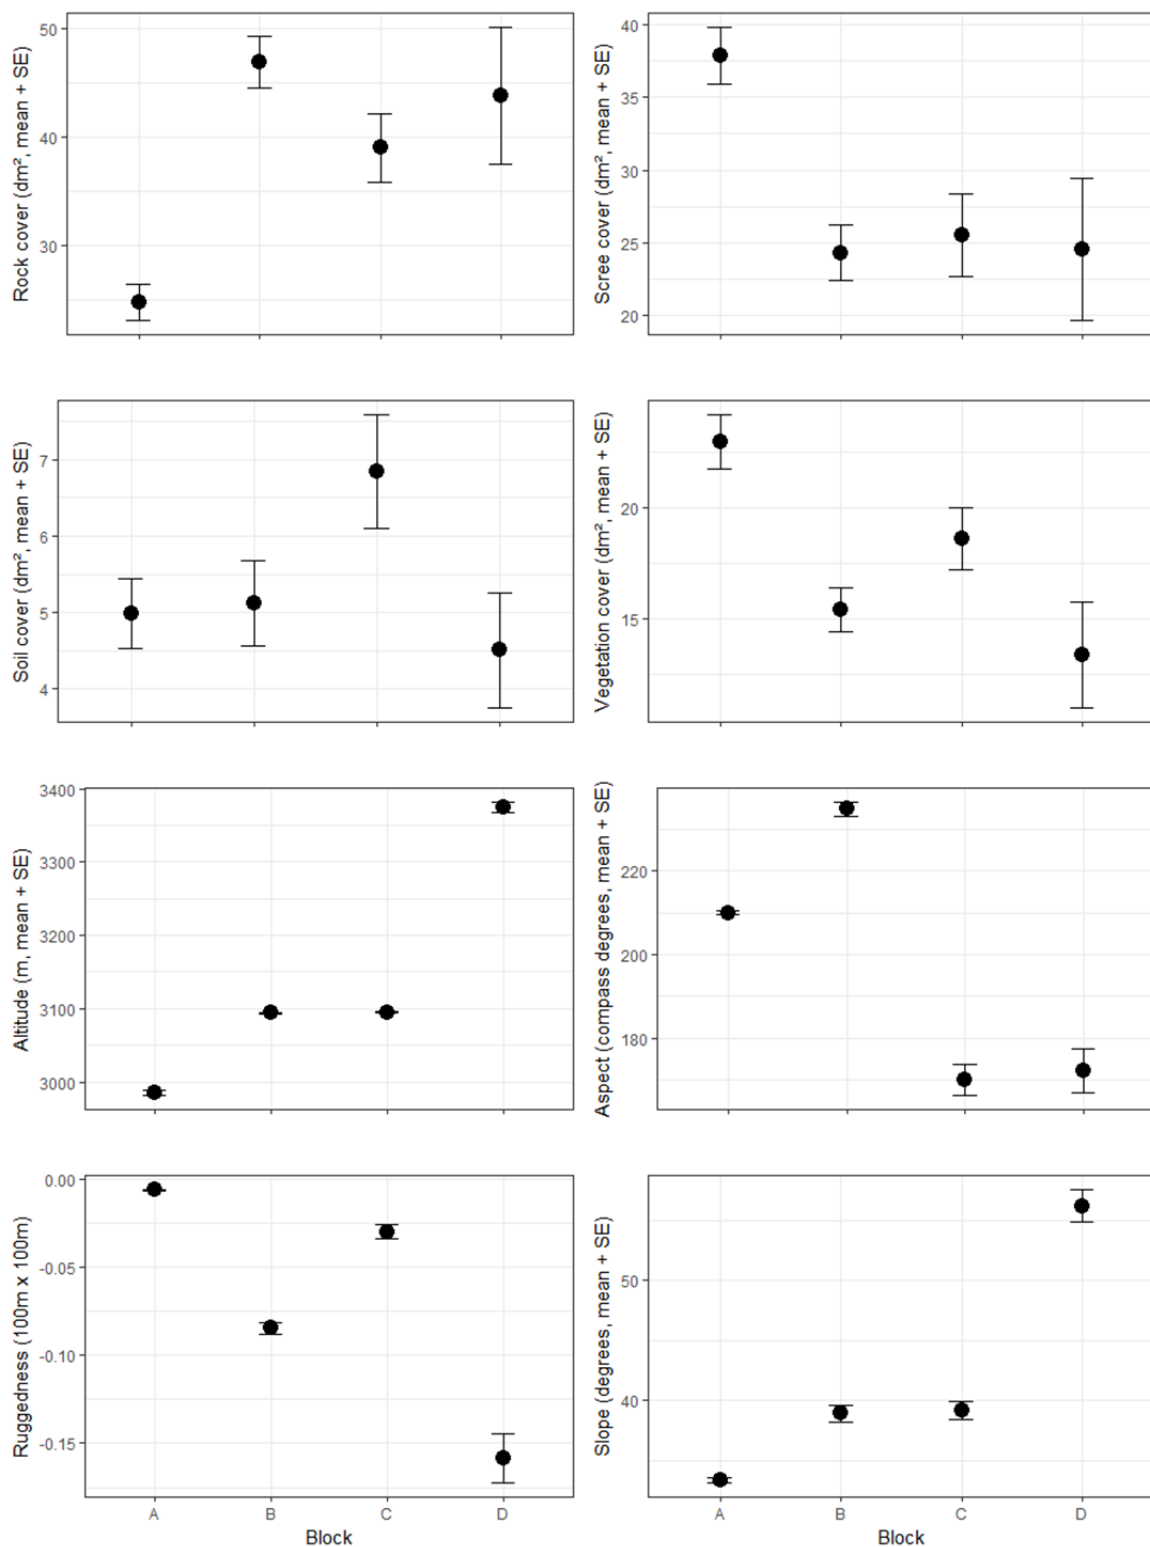

**Fig. S7** Topographic parameters per block on Mount Schrankogel. Means of estimated top cover of surface types per plot (rock, scree, bare soil and vegetation) and topographic parameters (altitude, aspect, slope and ruggedness) derived from a digital elevation model (© Land Tirol). Ruggedness was calculated as standard deviation of elevation with a 100 m x 100 m raster per plot by using ArcGIS 10.3. for Desktop, Esri Inc. For plot numbers per block see Table S1.



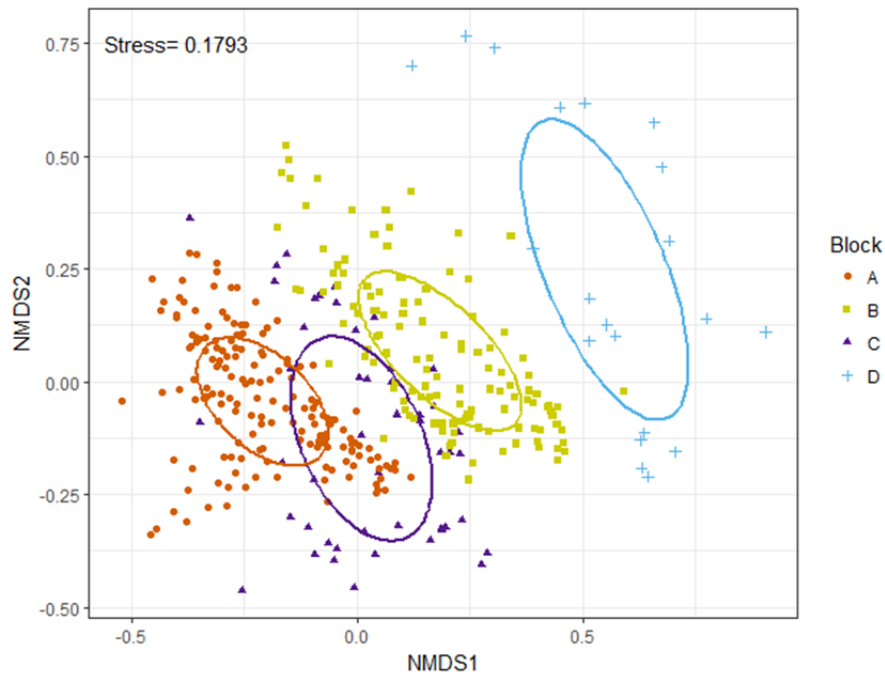

**Fig. S8** Non-metric multidimensional scaling (NMDS) of permanent plots on Mount Schrankogel, which was fitted using rescaled topographic parameters (altitude, aspect, slope, ruggedness) derived from a digital elevation model (© Land Tirol) and estimated cover of main surface types per plot (rock, scree, bare soil and vegetation). Ellipses represent the standard deviations of each plot score within each block. For plot numbers per block see Table S1.

**Table S22** Differences among blocks on Mount Schrankogel. Differences (estimate) among blocks (contrast), standard error (SE), degrees of freedom (df) and p-values derived from linear mixed effect models with the first axis of a non-metric multidimensional scaling of topographic parameters (Fig. S8) as response, block as fixed effect and transect as random effect. For plot numbers per block see Table S1.

| Contrast | Estimate | SE   | df    | p.value |
|----------|----------|------|-------|---------|
| A – B    | 0.44     | 0.08 | 8.87  | 0.001   |
| A – C    | 0.25     | 0.09 | 8.46  | 0.099   |
| A – D    | 0.81     | 0.08 | 13.50 | <0.001  |
| B – C    | 0.19     | 0.10 | 8.56  | 0.274   |
| B – D    | 0.37     | 0.08 | 13.10 | 0.003   |
| C – D    | 0.56     | 0.10 | 11.01 | <0.001  |

## Dataset 1994 – 2014 ( $n_{plot} = 654$ )

### Vascular plant species richness

**Table S23** Vascular plant species richness in the survey years 1994 and 2014 on Mount Schrankogel. **a)** Mean and standard error (SE) of raw data and **b)** least-square mean (lsmean), standard error (SE), degrees of freedom (df) and 95% confidence interval (LCL and UCL), derived from generalized linear mixed effect models with a penalized quasi-likelihood estimation and a Poisson distribution, of the species richness per plot in the two survey years. For plot numbers per block see Table S1.

| Year | Block | (a) Raw data |      | (b) Model |      |    |      |       |
|------|-------|--------------|------|-----------|------|----|------|-------|
|      |       | mean         | SE   | lsmean    | SE   | df | LCL  | UCL   |
| 1994 | All   | 9.95         | 0.17 | 8.02      | 1.08 | 3  | 5.22 | 12.32 |
| 2014 | All   | 12.64        | 0.19 | 10.19     | 1.37 | 3  | 6.64 | 15.65 |
| 1994 | A     | 10.58        | 0.22 | 9.47      | 1.63 | 4  | 5.88 | 15.25 |
| 2014 | A     | 14.18        | 0.24 | 12.69     | 2.18 | 4  | 7.88 | 20.43 |
| 1994 | B     | 8.36         | 0.27 | 7.83      | 1.12 | 3  | 4.97 | 12.33 |
| 2014 | B     | 9.75         | 0.28 | 9.13      | 1.30 | 3  | 5.80 | 14.37 |
| 1994 | C     | 12.27        | 0.43 | 11.82     | 0.44 | 1  | 7.33 | 19.07 |
| 2014 | C     | 14.80        | 0.47 | 14.26     | 0.53 | 1  | 8.92 | 22.81 |
| 1994 | D     | 5.69         | 0.43 | 5.21      | 0.58 | 25 | 4.14 | 6.54  |
| 2014 | D     | 6.54         | 0.49 | 5.98      | 0.66 | 25 | 4.77 | 7.50  |

**Table S24** Changes in vascular plant species richness in the period 1994-2014 on Mount Schrankogel. Effect sizes (estimate), 95% confidence interval (LCL and UCL) and p-values of the species richness per plot between the initial survey 1994 and the resurvey 2014, derived from generalized linear mixed effect models with a penalized quasi-likelihood estimation and a Poisson distribution. For plot numbers per block see Table S1.

| Block | Estimate | LCL  | UCL  | p-value |
|-------|----------|------|------|---------|
| All   | 0.24     | 0.22 | 0.26 | <0.001  |
| A     | 0.29     | 0.26 | 0.32 | <0.001  |
| B     | 0.15     | 0.12 | 0.19 | <0.001  |
| C     | 0.19     | 0.14 | 0.23 | <0.001  |
| D     | 0.14     | 0.04 | 0.24 | 0.011   |

### Colonisations and disappearances

**Table S25** Number of colonising and disappearing vascular plant species in the period 1994-2014 on Mount Schrankogel. **a)** Mean and standard error (SE) of raw data and **b)** least-square mean (lsmean), standard error (SE) and asymptotic 95% confidence interval (LCL and UCL), derived from negative binomial generalized linear mixed-effects models, of numbers of colonising and disappearing species per plot between the initial survey 1994 and the resurvey 2014. For plot numbers per block see Table S1.

| Type           | Bloc | (a) Raw data |      | (b) Model |      |       |       |
|----------------|------|--------------|------|-----------|------|-------|-------|
|                |      | mean         | SE   | lsmean    | SE   | LCL   | UCL   |
| Colonisations  | All  | 3.57         | 0.10 | 2.54      | 0.58 | 1.624 | 3.984 |
| Disappearances | All  | 0.88         | 0.04 | 0.63      | 0.15 | 0.401 | 0.995 |
| Colonisations  | A    | 4.51         | 0.14 | 4.39      | 0.34 | 3.765 | 5.121 |
| Disappearances | A    | 0.91         | 0.06 | 0.89      | 0.08 | 0.743 | 1.070 |
| Colonisations  | B    | 2.20         | 0.12 | 2.08      | 0.32 | 1.532 | 2.817 |
| Disappearances | B    | 0.82         | 0.08 | 0.77      | 0.13 | 0.553 | 1.067 |
| Colonisations  | C    | 3.53         | 0.24 | 3.23      | 0.56 | 2.296 | 4.550 |
| Disappearances | C    | 1.00         | 0.13 | 0.92      | 0.18 | 0.623 | 1.350 |
| Colonisations  | D    | 1.31         | 0.22 | 1.30      | 0.25 | 0.890 | 1.902 |
| Disappearances | D    | 0.46         | 0.14 | 0.46      | 0.14 | 0.255 | 0.826 |

**Table S26** Differences between numbers of colonising and disappearing vascular plant species in the period 1994-2014 on Mount Schrankogel. Effect sizes (estimate), 95% confidence interval (LCL and UCL) and p-values of differences of numbers of colonising and disappearing species per plot over the entire study area and for each block between 1994 and 2014, derived from negative binomial generalized linear mixed-effects models with an ANOVA likelihood ratio test. For plot numbers per block see Table S1.

| Block | Estimate | LCL  | UCL  | p-value |
|-------|----------|------|------|---------|
| All   | 1.39     | 1.28 | 1.51 | <0.001  |
| A     | 1.59     | 1.45 | 1.74 | <0.001  |
| B     | 1.00     | 0.77 | 1.22 | <0.001  |
| C     | 1.26     | 0.97 | 1.55 | <0.001  |
| D     | 1.04     | 0.32 | 1.76 | 0.001   |

## Changes in community-based ecological indicators

### Thermic indicator

**Table S27** Thermic indicator in the survey years 1994 and 2014 on Mount Schrankogel. Least-square mean (lsmean), standard error (SE), degrees of freedom (df, rounded to the nearest integer) and 95% confidence interval (LCL and UCL) of the thermic indicator per plot of the years 1994 and 2014. As a proxy for the thermal preferences of a species the altitudinal rank (1 = subnival-nival, 2 = alpine-subnival, 3 = alpine, 4 = treeline-alpine species; Gottfried et al., 2012) was used. Data were analysed with linear mixed-effects models. For plot numbers per block see Table S1.

| Year | Block | lsmean | SE   | df | LCL  | UCL  |
|------|-------|--------|------|----|------|------|
| 1994 | All   | 1.56   | 0.13 | 4  | 1.21 | 1.90 |
| 2014 | All   | 1.71   | 0.13 | 4  | 1.37 | 2.05 |
| 1994 | A     | 1.60   | 0.18 | 4  | 1.11 | 2.09 |
| 2014 | A     | 1.77   | 0.18 | 4  | 1.27 | 2.26 |
| 1994 | B     | 1.80   | 0.08 | 3  | 1.53 | 2.07 |
| 2014 | B     | 1.93   | 0.08 | 3  | 1.66 | 2.20 |
| 1994 | C     | 1.60   | 0.09 | 1  | 0.51 | 2.70 |
| 2014 | C     | 1.79   | 0.09 | 1  | 0.70 | 2.89 |
| 1994 | D     | 1.29   | 0.13 | 6  | 0.98 | 1.60 |
| 2014 | D     | 1.36   | 0.13 | 6  | 1.05 | 1.67 |

**Table S28** Thermophilisation in the period 1994-2014 on Mount Schrankogel. Mean changes (estimate) in thermic indicator ( $\Delta$  indicator = thermophilisation) between 1994 and 2014, with 95% confidence interval (LCL and UCL) and p-value, derived from linear mixed-effects models and likelihood ratio tests. For plot numbers per block see Table S1.

| Block | Estimate | LCL  | UCL  | p-value |
|-------|----------|------|------|---------|
| All   | 0.15     | 0.14 | 0.17 | <0.001  |
| A     | 0.17     | 0.14 | 0.19 | <0.001  |
| B     | 0.12     | 0.09 | 0.16 | <0.001  |
| C     | 0.19     | 0.15 | 0.23 | <0.001  |
| D     | 0.07     | 0.02 | 0.12 | 0.009   |

## Soil moisture indicator

**Table S29** Soil moisture indicator in the survey years 1994 and 2014 on Mount Schrankogel. Least-square mean (lsmean), standard error (SE), rounded degrees of freedom (df) and 95% confidence interval (LCL and UCL) of the soil moisture indicator per plot in the three survey years. As a proxy for the soil moisture preferences of a species the indicator value for soil moisture (1 = very dry to 4 = very moist; Landolt et al., 2010) was used. Data were analysed with linear mixed-effects models. For plot numbers per block see Table S1.

| Year | Block | lsmean | SE   | df | LCL  | UCL  |
|------|-------|--------|------|----|------|------|
| 1994 | All   | 2.97   | 0.10 | 4  | 2.68 | 3.26 |
| 2014 | All   | 2.83   | 0.10 | 4  | 2.55 | 3.12 |
| 1994 | A     | 2.97   | 0.10 | 4  | 2.69 | 3.24 |
| 2014 | A     | 2.83   | 0.10 | 4  | 2.55 | 3.10 |
| 1994 | B     | 2.82   | 0.09 | 3  | 2.53 | 3.12 |
| 2014 | B     | 2.71   | 0.09 | 3  | 2.41 | 3.01 |
| 1994 | C     | 2.82   | 0.04 | 1  | 1.94 | 3.69 |
| 2014 | C     | 2.64   | 0.04 | 1  | 1.76 | 3.51 |
| 1994 | D     | 3.22   | 0.14 | 6  | 2.88 | 3.55 |
| 2014 | D     | 3.10   | 0.14 | 6  | 2.76 | 3.43 |

**Table S30** Changes in soil moisture in the period 1994-2014 on Mount Schrankogel. Mean changes (estimate) in soil moisture indicator between 1994 and 2014, with 95% confidence interval (LCL and UCL) and p-value, derived from linear mixed-effects models and likelihood ratio test. For plot numbers per block see Table S1.

| Block | Estimate | LCL   | UCL   | p-value |
|-------|----------|-------|-------|---------|
| All   | -0.14    | -0.16 | -0.12 | <0.001  |
| A     | -0.14    | -0.17 | -0.11 | <0.001  |
| B     | -0.12    | -0.14 | -0.09 | <0.001  |
| C     | -0.18    | -0.23 | -0.14 | <0.001  |
| D     | -0.12    | -0.19 | -0.05 | 0.002   |

## References

- Burnham KP, Anderson DR. 2002.** *Model selection and multimodel inference: a practical information-theoretic approach.* New York: Springer-Verlag.
- Gottfried M, Pauli H, Futschik A, Akhalkatsi M, Barancok P, Benito Alonso JL, Coldea G, Dick J, Erschbamer B, Fernandez Calzado MR, et al. 2012.** Continent-wide response of mountain vegetation to climate change. *Nature Climate Change* 2: 111-115.
- Landolt E, Bäumler B, Erhardt A, Hegg O, Klötzli F, Lämmler W, Nobis M, Rudmann-Maurer K, Schweingruber FH, Theurillat J-P, et al. 2010.** *Flora indicativa: Ökologische Zeigerwerte und biologische Kennzeichen zur Flora der Schweiz und der Alpen / Ecological indicator values and biological attributes of the Flora of Switzerland and the Alps.* Bern: Haupt Verlag.
